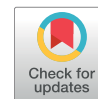

RESPONSE TO COMMENT ON ROSENSTOCK ET AL.

Julio Rosenstock

## Impact of a Weekly Glucagon-Like Peptide 1 Receptor Agonist, Albiglutide, on Glycemic Control and on Reducing Prandial Insulin Use in Type 2 Diabetes Inadequately Controlled on Multiple Insulin Therapy: A Randomized Trial. *Diabetes Care* 2020;43:2509–2518

*Diabetes Care* 2021;44:e196–e197 | <https://doi.org/10.2337/dci21-0004>

I thank Dr. Marathe and coauthors, who are part of the superb team of Michael Horowitz and Karen Jones, world-renowned top experts in gastric emptying (1), for recognizing the clinical value of our albiglutide switch study (HARMONY 8), which provided proof of concept for the benefits of using a weekly glucagon-like peptide 1 receptor agonist (GLP-1RA) to simplify an intensive multiple-insulin regimen in patients with long-standing type 2 diabetes previously on basal-bolus insulin (2). We clearly demonstrated that 54% of participants randomized to the albiglutide + basal insulin glargine group were able to replace all prandial insulin without reintroducing insulin lispro, and, for those who still needed prandial insulin, their insulin doses were substantially reduced. Most importantly, improvements of HbA<sub>1c</sub> to <7% were similar to the levels achieved by the control group, which was randomized to continue with an optimized basal-bolus insulin regimen. However, those on the weekly GLP-1RA regimen improved their glycemic control without increasing hypoglycemia risk and with the added benefit of weight loss compared with the basal-bolus arm (3).

Horowitz, Jones, and colleagues (1) commented on our data and, by focusing on their scholarly expertise on gastric

emptying and its impact on postprandial hyperglycemia, honored the proverb “If all you have is a hammer, everything looks like a nail.” They correctly assumed that postprandial hyperglycemia was probably the main contributing factor to the baseline HbA<sub>1c</sub> of 7.8% after optimizing the basal-bolus regimen during the lead-in period before randomization. They postulated that measuring gastric emptying in these patients with type 2 diabetes to determine if the rate of gastric emptying was rapid or slow may help in selecting the type of GLP-1RA to be employed. Contrary to the current belief that long-acting GLP-1RAs have minimal to no sustained effect on gastric emptying due to tachyphylaxis, they mentioned that daily and weekly GLP-1RA may still have some impact on gastric emptying to reduce postprandial hyperglycemia (4,5). Their theoretical concept that those patients with rapid gastric emptying and modest hyperglycemia, such as an HbA<sub>1c</sub> <8%, may benefit more with a short-acting GLP-1RA, shown to have more sustained and stronger effects on slowing gastric emptying, is interesting and deserves to be tested. However, even with albiglutide, which was probably the weakest of all weekly GLP-1RAs, the HbA<sub>1c</sub> was reduced from 7.8% to 6.7%, and the total number of insulin

injections was more than halved, reduced from 29 to 13 injections per week. Thus, it is highly conceivable that similar or even more robust improvements in HbA<sub>1c</sub> and greater reductions in the number of prandial insulin injections, hopefully to none, may be achieved with more potent weekly GLP-1RAs such as dulaglutide or semaglutide (6,7). Therefore, measuring gastric emptying is an excellent idea for clinical research purposes, but I believe it is neither essential nor feasible in clinical practice.

**Duality of Interest.** J.R. has served on advisory panels for Applied Therapeutics, Boehringer Ingelheim, Eli Lilly, Intarcia, Janssen, Novo Nordisk, Oramed, Sanofi, and Zealand and has received research support from Applied Therapeutics, AstraZeneca, Boehringer Ingelheim, Eli Lilly, Genentech, GlaxoSmithKline, Intarcia, Janssen, Lexicon, Merck, Novo Nordisk, Oramed, Pfizer, and Sanofi. No other potential conflicts of interest relevant to this article were reported.

### References

- Phillips LK, Deane AM, Jones KL, Rayner CK, Horowitz M. Gastric emptying and glycaemia in health and diabetes mellitus. *Nat Rev Endocrinol* 2015;11:112–128
- Marathe CS, Jones KL, Rayner CK, Wu T, Horowitz M. Comment on Rosenstock et al. Impact of a weekly glucagon-like peptide 1 receptor agonist, albiglutide, on glycemic control and on reducing prandial insulin use in type 2 diabetes inadequately controlled on multiple

Dallas Diabetes Research Center, Dallas, TX

Corresponding author: Julio Rosenstock, [juliorosenstock@dallasdiabetes.com](mailto:juliorosenstock@dallasdiabetes.com)

© 2021 by the American Diabetes Association. Readers may use this article as long as the work is properly cited, the use is educational and not for profit, and the work is not altered. More information is available at <https://www.diabetesjournals.org/content/license>.

insulin therapy: a randomized trial. *Diabetes Care* 2020;43:2509–2518 (Letter). *Diabetes Care* 2021;44:e194–e195. DOI: 10.2337/dc20-2987

3. Rosenstock J, Nino A, Soffer J, et al. Impact of a weekly glucagon-like peptide 1 receptor agonist, albiglutide, on glycemic control and on reducing prandial insulin use in type 2 diabetes inadequately controlled on multiple insulin therapy: a randomized trial. *Diabetes Care* 2020;43:2509–2518

4. Jones KL, Huynh LQ, Hatzinikolas S, et al. Exenatide once weekly slows gastric emptying of

solids and liquids in healthy, overweight people at steady-state concentrations. *Diabetes Obes Metab* 2020;22:788–797

5. Meier JJ, Rosenstock J, Hincelin-Méry A, et al. Contrasting effects of lixisenatide and liraglutide on postprandial glycemic control, gastric emptying, and safety parameters in patients with type 2 diabetes on optimized insulin glargine with or without metformin: a randomized, open-label trial. *Diabetes Care* 2015;38:1263–1273

6. Pozzilli P, Norwood P, Jódar E, et al. Placebo-controlled, randomized trial of the addition of once-weekly glucagon-like peptide-1 receptor agonist dulaglutide to titrated daily insulin glargine in patients with type 2 diabetes (AWARD-9). *Diabetes Obes Metab* 2017;19:1024–1031

7. Rodbard HW, Lingvay I, Reed J, et al. Semaglutide added to basal insulin in type 2 diabetes (SUSTAIN 5): a randomized, controlled trial. *J Clin Endocrinol Metab* 2018;103:2291–2301
